# Supplementary material for: Lipopeptide Interplay Mediates Molecular Interactions between Soil Bacilli and Pseudomonads
Source: PubMed Central journal article supplement (PMC8653830; doi:10.1128/spectrum.02038-21), 2021-12-08
Supplement: spectrum02038-21_supp_1_seq5.pdf [file spectrum02038-21_supp_1_seq5.pdf]

Table S1. Strains and plasmids used in this study.

| Relevant genotype, description<br>(Genome bank number when sequenced) |                                                                                                                                                                                                | References or sources |
|-----------------------------------------------------------------------|------------------------------------------------------------------------------------------------------------------------------------------------------------------------------------------------|-----------------------|
| <b><i>Bacillus velezensis</i></b>                                     |                                                                                                                                                                                                |                       |
| GA1                                                                   | Wild type (CP046386)                                                                                                                                                                           | (1)                   |
| GA1 $\Delta amyE::cat P_{veg^-}gfpmut3$<br>(called GA1 GFP)           | GA1 disrupted of <i>amyE</i> gene; Cm <sup>R</sup> and harbouring a constitutive transcriptional fusion ( $P_{veg^-}gfpmut3$ ).                                                                | This study            |
| GA1 $\Delta srfaA::cat$                                               | GA1 deleted of <i>srfaA</i> gene; Cm <sup>R</sup> ; unable to produce surfactins                                                                                                               | This study            |
| S499                                                                  | Wild type (NZ_CP014700)                                                                                                                                                                        | (2)                   |
| FZB42                                                                 | Wild type (NC_009725)                                                                                                                                                                          | (3)                   |
| QST713                                                                | Wild type (NZ_CP025079)                                                                                                                                                                        | (4)                   |
| <b><i>Pseudomonas sessilinigenes</i></b>                              |                                                                                                                                                                                                |                       |
| CMR12a                                                                | Wild type (NZ_CP027706)                                                                                                                                                                        | (5) (6)               |
| $\Delta sesA$                                                         | CMR12a disrupted of <i>sesA</i> gene; Gm <sup>R</sup> ; unable to produce sessilins                                                                                                            | (7)                   |
| $\Delta ofaBC$                                                        | CMR12a deleted of <i>ofaB</i> and <i>ofaC</i> genes; Gm <sup>R</sup> ; unable to produce orfamides                                                                                             | (8)                   |
| $\Delta phz$                                                          | CMR12a deleted of phenazine biosynthesis operon; unable to produce phenazines                                                                                                                  | (7)                   |
| $\Delta sesA-ofaBC$                                                   | CMR12a disrupted of <i>sesA</i> gene and deleted <i>ofaB</i> and <i>ofaC</i> genes; Gm <sup>R</sup> ; unable to produce sessilins and orfamides                                                | (8)                   |
| $\Delta sesA-phz$                                                     | CMR12a disrupted of <i>sesA</i> gene and deleted phenazines biosynthesis operons; Gm <sup>R</sup> ; unable to produce sessilins and phenazines                                                 | (7)                   |
| $\Delta ofaAC-phz$                                                    | CMR12a deleted of <i>ofaB</i> and <i>ofaC</i> genes and phenazines biosynthesis operons; unable to produce orfamides and phenazines                                                            | (8)                   |
| $\Delta sesA-ofaBC-phz$                                               | CMR12a disrupted of <i>sesA</i> gene and deleted <i>ofaB</i> and <i>ofaC</i> genes and phenazine biosynthesis operons; Gm <sup>R</sup> ; unable to produce sessilins, orfamides and phenazines | (8)                   |
| $\Delta pchA$                                                         | CMR12a deleted of <i>pchA</i> gene; unable to produce enantio-pyochelin                                                                                                                        | This study            |
| $\Delta pvdI$                                                         | CMR12a deleted of <i>pvdI</i> gene; unable to produce pyoverdine                                                                                                                               | This study            |
| $\Delta pvdI-pchA$                                                    | CMR12a deleted of <i>pvdI</i> and <i>pchA</i> genes; unable to produce pyoverdine and enantio-pyochelin                                                                                        | This study            |
| <b><i>Pseudomonas protegens</i></b>                                   |                                                                                                                                                                                                |                       |
| Pf-5                                                                  | Wild type; orfamide producer (NC_004129)                                                                                                                                                       | (9)                   |
| CHA0                                                                  | <i>mCherry</i> tagged derivative of CHA0; orfamide producer (NC_021237)                                                                                                                        | (10)                  |
| <b><i>Pseudomonas chlororaphis</i></b>                                |                                                                                                                                                                                                |                       |
| JV497                                                                 | <i>mCherry</i> tagged derivative of JV497; non-CLPs producer (NZ_VWPC00000000)                                                                                                                 | (11)                  |
| JV395B                                                                | <i>mCherry</i> tagged derivative of JV395B; non-CLPs producer (NZ_VWPB00000000)                                                                                                                | (11)                  |
| <b><i>Pseudomonas wayambapatensis</i></b>                             |                                                                                                                                                                                                |                       |
| RW10S2                                                                | Wild type; WLIP producer                                                                                                                                                                       | (12)                  |
| <b><i>Pseudomonas mosselii</i></b>                                    |                                                                                                                                                                                                |                       |
| BW11M1                                                                | Wild type; xantholysins producer                                                                                                                                                               | (13)                  |
| <b><i>Pseudomonas putida</i></b>                                      |                                                                                                                                                                                                |                       |
| WCU_64                                                                | Wild type; putisolvins producer                                                                                                                                                                | (14)                  |
| <b><i>Pseudomonas lactis</i></b>                                      |                                                                                                                                                                                                |                       |
| SS101                                                                 | Wild type; massetolides producer (NZ_CM001513)                                                                                                                                                 | (15)                  |
| <b><i>Pseudomonas kilonensis</i></b>                                  |                                                                                                                                                                                                |                       |
| F113                                                                  | Wild type; viscosines producer (NC_016830)                                                                                                                                                     | (16)                  |
| <b><i>Pseudomonas tolaasii</i></b>                                    |                                                                                                                                                                                                |                       |
| CH36                                                                  | Wild type; tolaasins and pseudodesmins producer                                                                                                                                                | (12)                  |
| CH36 $\Delta toIA$                                                    | CH36 disrupted of <i>toIA</i> gene; Gm <sup>R</sup> ; unable to produce tolaasins                                                                                                              | (12)                  |
| <b><i>E. coli</i></b>                                                 |                                                                                                                                                                                                |                       |
| DH5 $\alpha$ <i>pir</i>                                               | <i>supE44</i> , $\Delta lacU169$ ( $\Phi lacZ\Delta M15$ ), <i>recA1</i> , <i>endA1</i> , <i>hsdR17</i> , <i>thi-1</i> , <i>gyrA96</i> , <i>relA1</i> , <i>Apr</i>                             | (17)                  |
| DH5 $\alpha$ p497                                                     | Helper strain harboring p497 plasmid                                                                                                                                                           | C. Keel laboratory    |
| <b>Plasmids</b>                                                       |                                                                                                                                                                                                |                       |
| pGEM-T                                                                | pGEM-T Easy derivative harboring the recombinant region <i>amyE::cat P_{veg^-}gfpmut3</i> ; Cm <sup>R</sup>                                                                                    | (18)                  |
| pOT1eM                                                                | pOT1e derivative harboring <i>Ptac-m-cherry</i> inserted in Clal-Sall site; Gm <sup>R</sup>                                                                                                    | (19)                  |

|                         |                                                                                                   |                              |
|-------------------------|---------------------------------------------------------------------------------------------------|------------------------------|
| pME6010- <i>eforRed</i> | pME6010 derivative harboring <i>PJ23101-eforRed</i> inserted in XhoI site; TetR                   | (T. Meyer, unpublished data) |
| pEMG                    | pSEVA212S; oriR6K, <i>lacZa</i> with two flanking I-SceI sites; Km <sup>r</sup> , Ap <sup>r</sup> | (20)                         |
| pEMG- <i>pchA</i>       | Suicide plasmid used for the deletion of <i>pchA</i>                                              | This study                   |
| pEMG- <i>pvdI</i>       | Suicide plasmid used for the deletion of <i>pvdI</i>                                              | This study                   |
| pSW-2                   | oriRK2, <i>xyIS</i> , <i>P<sub>m</sub>::I-sceI</i> ; Gm <sup>R</sup>                              | (20)                         |

Table S2. Primers used in this study.

| Primer Name                     | Primer sequence (5'->3')                            | Targeted genes                          |
|---------------------------------|-----------------------------------------------------|-----------------------------------------|
| <b>Deletion mutant</b>          |                                                     |                                         |
| <b><i>B. velezensis</i></b>     |                                                     |                                         |
| <b>GA1</b>                      |                                                     |                                         |
| UpsrfaAF                        | TCAGCAAACTGCGTGGTAG                                 |                                         |
| UpsrfaAR                        | CCAATTTTCGAATTCTTTTACCGCGATAAAAAGTTATTTCCATATGTGTGC |                                         |
| DwsrfAF                         | CAGCTCCAGATCCTCTACGCCGGACACGCTTTATATCGTGCCGAA       | <i>sfaA</i>                             |
| DwsrfAR                         | AAGAAATGATCATAAATACC                                |                                         |
| <b><i>P. sessilinigenes</i></b> |                                                     |                                         |
| <b>CMR12a</b>                   |                                                     |                                         |
| UppvdIF                         | GGCATTCTTGACCGGTCGTC                                |                                         |
| UppvdIR                         | GTGTTGTCCATTACACAGCCTCCATTGCATTCATCGGGAGTCATCC      |                                         |
| DwpvdIF                         | ATGGAGGCTGTGTAATGGACAACA                            |                                         |
| DwpvdIR                         | TGTAGCGGTGTAGCAGAG                                  | <i>pvdI</i>                             |
| pvdICheckF                      | CCTGCTGCTGGAAGGATTGA                                |                                         |
| pvdICheckR                      | GGATCGAGCTGCCAAAGGAA                                |                                         |
| UppchAF                         | GACCAACTGCCGGCGGAT                                  |                                         |
| UppchAR                         | CCTTCAGCGATCGGCCGGTGCATCACATCTTGCCTCCTTGCTCC        |                                         |
| DwpchAF                         | TGATGCACCGGCCGATC                                   |                                         |
| DwpchAR                         | GTGGTGAAGCTTTCCATGCC                                | <i>pchA</i>                             |
| pchAcheckF                      | TCATCCACTGGAACATCGCC                                |                                         |
| pchAcheckR                      | GCGGACTGATTTCTCGGTA                                 |                                         |
| <b>Antibiotic marker</b>        |                                                     |                                         |
| CatF                            | CGCGGTAAAAGAATTCGAAAA                               | Chloramphenicol marker                  |
| CatR                            | GTCCGGCGTAGAGGATCTG                                 |                                         |
| PhleoF                          | GTCATAGCTGTTTCCTGCCAAAAGGGGTTTCATTTT                | Phleomycin marker                       |
| PhleoR                          | ACTGGCCGTCGTTTTACTCCAATAAATGCGACACCAA               |                                         |
| KanF                            | GTCATAGCTGTTTCCTGCTTAGCTCCTGAAAATCTCGG              | Kanamycin marker                        |
| KanR                            | ACTGGCCGTCGTTTTACCTGATAAATACTAATACTAGGAGAAG         |                                         |
| nptIIIF                         | GAGGATCGTTTCGCATGATT                                | Kanamycin marker for <i>Pseudomonas</i> |
| nptIIIR                         | CGCTCAGAAGAAGCTGTC                                  |                                         |
| psw-F                           | GGACGCTTCGCTGAAAAC                                  | pSW-II insertion                        |
| psw-R                           | AACGTCGTGACTGGGAAAAC                                |                                         |



**Figure S1. Diversity of predicted and detectable bioactive secondary metabolites (BSMs) produced by *B. velezensis* strain GA1. (A) Prediction of *B. velezensis* GA1 secondary metabolites. Biosynthetic gene clusters (genome annotation, Genbank: CP046386) were predicted by antiSMASH 6.0 (21). (B) GA1 BSMs and their corresponding main described activities and raw formula. Detected m/z ( $[M+H]^+$ ) of each variant and mass error (in ppm, compared to theoretical mass) are calculated based on UPLC-MS analyses of supernatants coming from exudate mimicking (EM) and casamino acid (CAA) medium culture. Relative abundance of each BSMs is shown for both media. The numbers (superscript) next to the molecule name indicate the corresponding BSMs structure depicted in C. Structural changes leading to variants are indicated in red.**

| CLPs           | Fatty acid | Amino acids |     |              |     |     |     |     |     |     |     |     |     |     |              |     |     |     |          | References |
|----------------|------------|-------------|-----|--------------|-----|-----|-----|-----|-----|-----|-----|-----|-----|-----|--------------|-----|-----|-----|----------|------------|
|                |            | 1           | 2   | 3            | 4   | 5   | 6   | 7   | 8   | 9   | 10  | 11  | 12  | 13  | 14           | 15  | 16  | 17  | 18       |            |
| Massetolide A  | (3OH) C10  | Leu         | Glu | $\alpha$ Thr | Val | Leu | Ser | Leu | Ser | Ile |     |     |     |     |              |     |     |     |          | (22)       |
| Pseudodesmin A | (3OH) C10  | Leu         | Gln | $\alpha$ Thr | Val | Leu | Ser | Leu | Ser | Ile |     |     |     |     |              |     |     |     |          | (22)       |
| WLIP           | (3OH) C10  | Leu         | Glu | $\alpha$ Thr | Val | Leu | Ser | Leu | Ser | Ile |     |     |     |     |              |     |     |     |          | (22, 23)   |
| Orfamide B     | (3OH) C14  | Leu         | Glu | $\alpha$ Thr | Val | Leu | Ser | Leu | Leu | Ser | Val |     |     |     |              |     |     |     | (8)      |            |
| Putisolvin III | C6         | Leu         | Glu | Leu          | Leu | Gln | Ser | Val | Leu | Ser | Leu | Val | Ser |     |              |     |     |     | (23, 24) |            |
| Xanthohysin A  | (3OH) C10  | Leu         | Glu | Gln          | Val | Leu | Gln | Ser | Val | Leu | Gln | Leu | Leu | Gln | Ile          |     |     |     | (13, 23) |            |
| Tolaasin D     | (3OH) C8   | Dhb         | Pro | Ser          | Leu | Val | Ser | Leu | Val | Val | Gln | Leu | Val | Dhb | $\alpha$ Thr | Leu | Hse | Dab | Lys      | (25)       |
| Sessilin A     | (3OH) C8   | Dhb         | Pro | Ser          | Leu | Val | Gln | Leu | Val | Val | Gln | Leu | Val | Dhb | $\alpha$ Thr | Ile | Hse | Dab | Lys      | (26)       |

**Figure S2. Simplified structural representation of the cyclic lipopeptides (CLPs) produced by *Pseudomonas* strains used in this study.** The fatty acid chain length is presented and the amino acid composition are depicted indicating where cyclization occurs. For each CLP, only the main form detected is represented, for more details about minor variants see the also corresponding associated references (8, 13, 22–26).

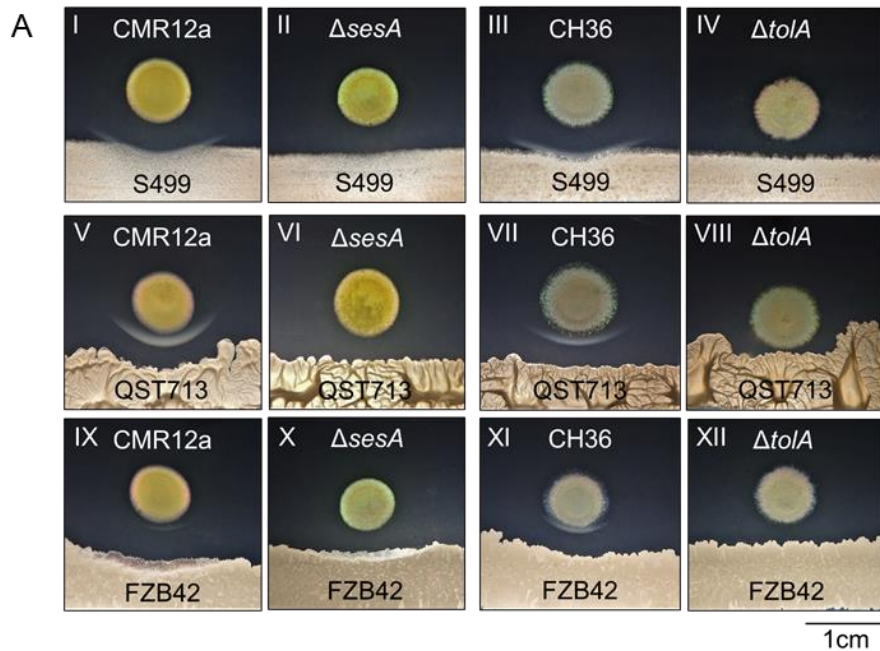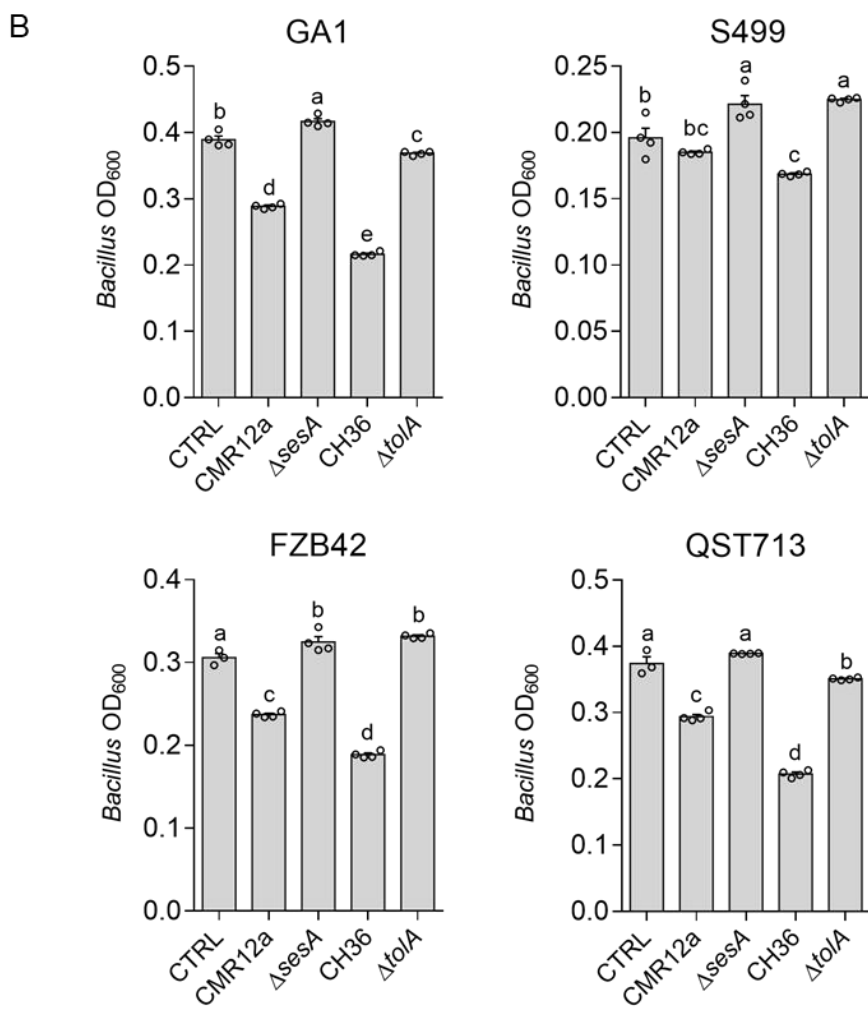

**Figure S3. The interplay between surfactins and sessilins/tolaasins is conserved within *B. velezensis*.** **(A)** The white-line formation is dependent on the co-presence of surfactins and sessilins/tolaasins producers while during the interaction between *B. velezensis* wild-type strains (S499, QST713, FZB42) and *P. sessilinigenes* CMR12a (CMR12a) or *P. tolaasii* CH36 (CH36) mutants impaired in the production of sessilins ( $\Delta$ *sesA*) or tolaasins ( $\Delta$ *tolA*), respectively, no white line is observed. Sessilins/tolaasins production induces slight growth inhibition of all tested *B. velezensis* strains (panels I, III, V, VII, IX, XI). No inhibition is observed in confrontation assays with *Pseudomonas* mutants unable to produce sessilins or tolaasins (panels II, IV, VI, VIII, X, XII). The figure shows one representative repetition of three biological replicates with three technical repetitions (n=9). **(B)** Optical density (at 600nm) of different *B. velezensis* (GA1, S499, FZB42 and QST713) after 10 h culture supplemented with 4% (v/v) CMR12a or CH36 supernatants and their mutants unable to produce sessilins or tolaasins, respectively. Un-supplemented culture is represented as control (CTRL). Graphs show mean  $\pm$  SD calculated from four replicate cultures (n = 4). Letters a to d indicate statistically significant differences according to Tukey's HSD test ( $\alpha$ = 0.05).

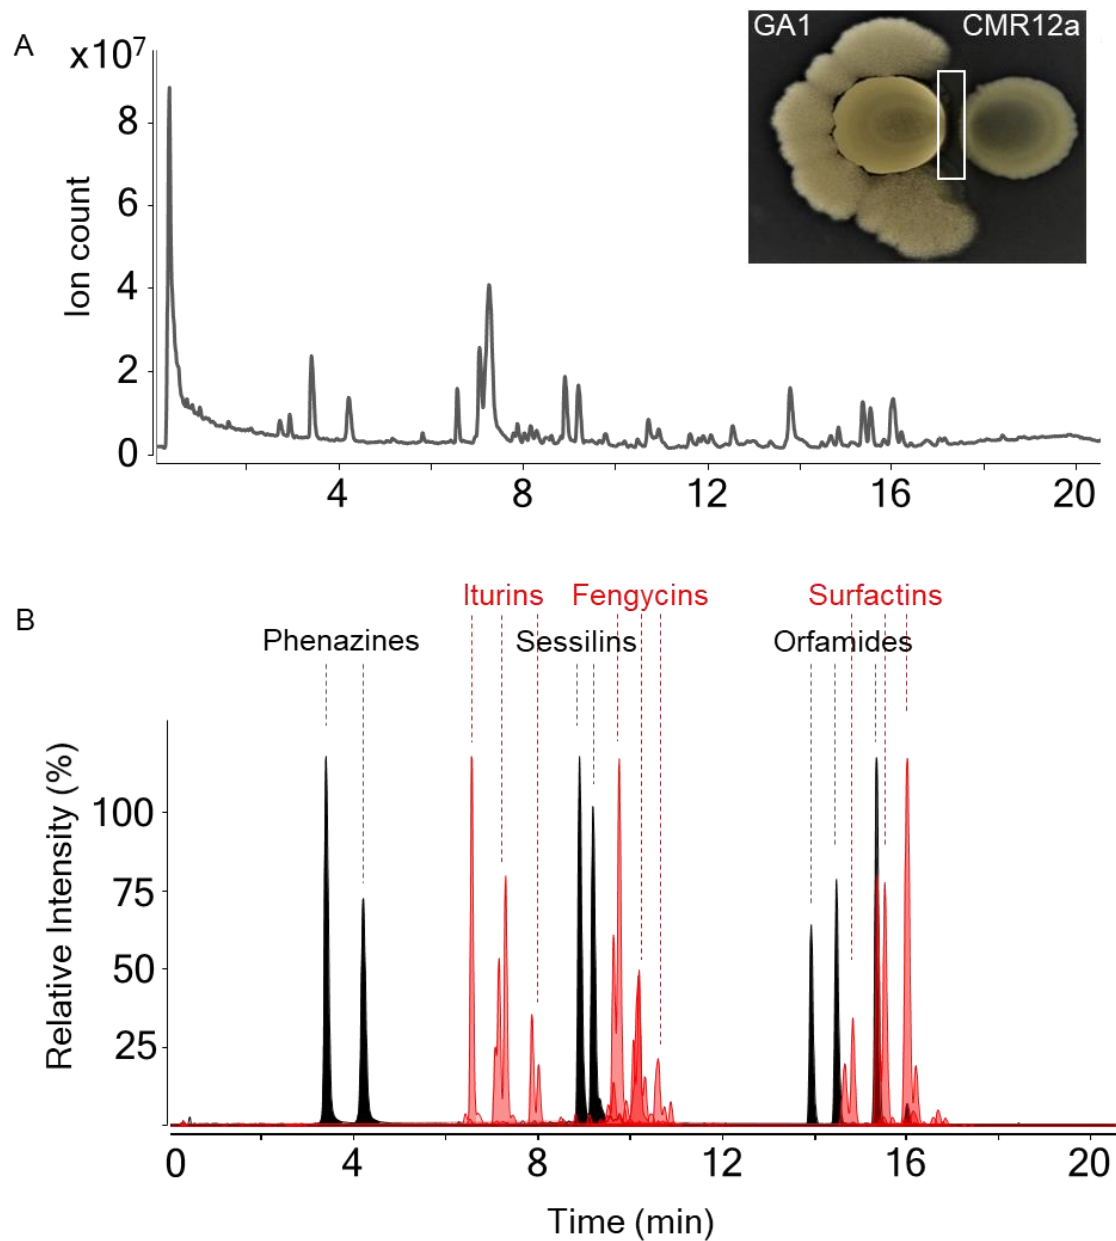

**Figure S4. *P. sessilinigenes* CMR12a and *B. velezensis* GA1 BSMs production upon confrontation on solid EM medium. (A) Total ion chromatogram (TIC) and (B) Extracted ion chromatograms (EICs) overlaid for each BSMs produced by CMR12a (black) and GA1 (red) in the confrontation zone (labelled as a white rectangle on the upper-right confrontation figure) on solid EM medium after 24h. The intensity was fixed**

to 100% for the main variant of each family. The figure shows one representative repetition of two biological replicates with three technical repetitions (n=6).

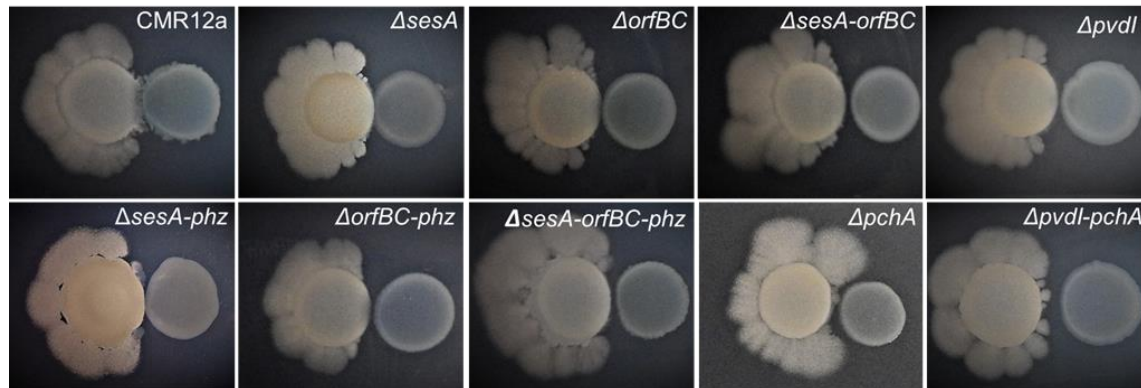

**Figure S5: Effect of *P. sessilinigenes* CMR12a mutants on *B. velezensis* GA1**

**motility.** GA1 (left colony) enhanced motility upon confrontation with CMR12a wild-type (CMR12a) or mutants repressed in the synthesis of sessilins ( $\Delta sesA$ ), orfamides ( $\Delta ofaBC$ ), orfamides and phenazines ( $\Delta ofaBC-phz$ ), sessilins and orfamides ( $\Delta sesA-ofaBC$ ), sessilins and phenazines ( $\Delta sesA-phz$ ), their triple mutant ( $\Delta sesA-ofaBC-phz$ ), pyoverdine ( $\Delta pvdI$ ), enantio-pyochelin ( $\Delta pchA$ ) or their double mutant ( $\Delta pvdI-pchA$ ) (see Table S1 for metabolome of each mutant). The figure shows one representative repetition of three biological replicates with three technical repetitions (n=9).



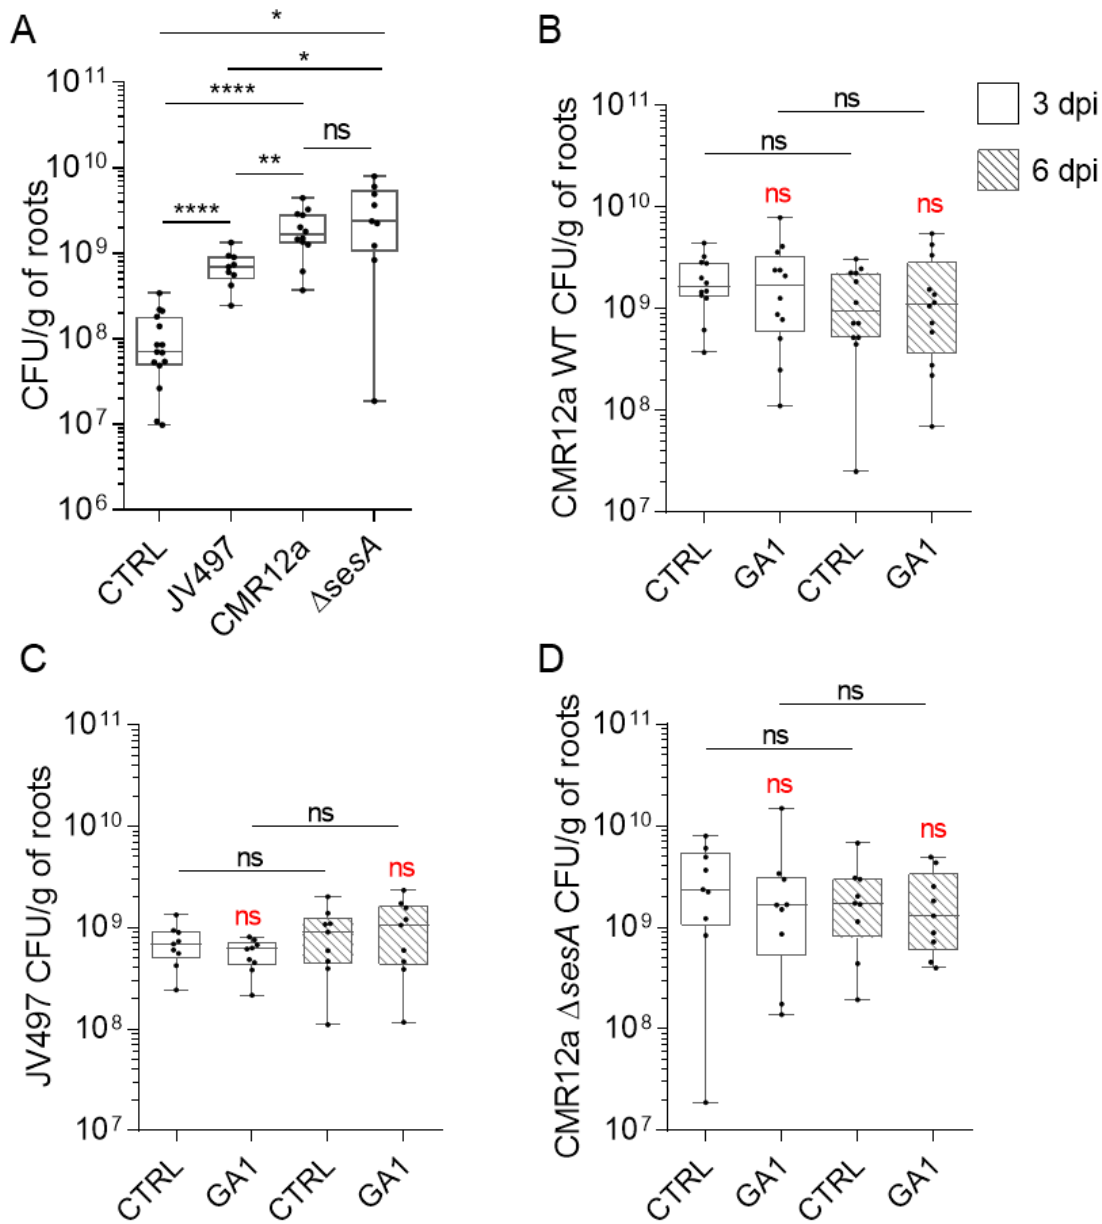

**Figure S6. *B. velezensis* GA1 and *Pseudomonas* spp. tomato root colonization.**

**(A)** GA1, JV497, CMR12a and  $\Delta$ sesA population, expressed as colony forming units per gram of tomato roots (CFU/g of roots) recovered three days after single inoculation.

Comparison between single (CTRL) and co-colonization (GA1) of tomato roots (CFU/g of roots) by CMR12a **(B)**, JV497 **(C)**, and CMR12a mutant  $\Delta$ sesA **(D)** between three (3

dpi, empty bars) and six (6 dpi, hatched bars) days after (co-)inoculation. Box plots were generated based on data from at least three independent assays each involving 6 plants per treatment (n=18). The whiskers extend to the minimum and maximum values, and the midline indicates the median. Statistical comparisons between treatments were realized with Mann–Whitney-test, "ns" no significant difference and "\*\*\*\*",  $P < 0.0001$ . The statistical differences between mono- and co-inoculated conditions are indicated as red-coloured labels while the statistical differences of the same condition between 3 and 6 dpi are indicated as black-coloured labels.

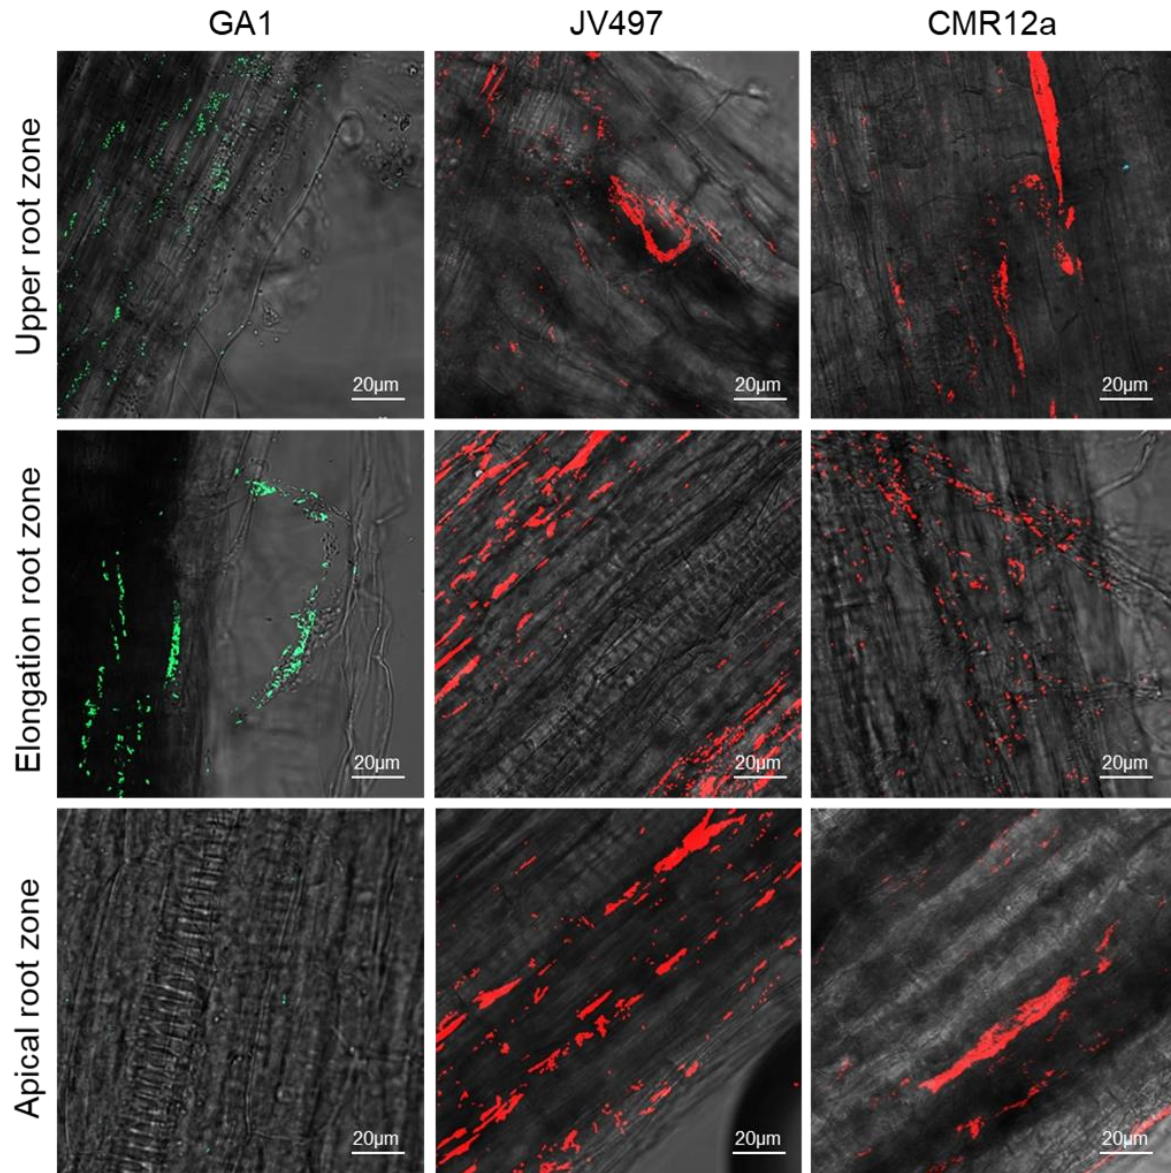

**Figure S7. Confocal laser microscopy images of colonization and distribution of *B. velezensis* GA1, *P. chlororaphis* JV497 or *P. sessilinigenes* CMR12a along tomato roots. GA1, JV497, CMR12a root colonization and distribution on apical, elongation and upper root zones of tomato, 6 dpi. Cells expressing *GFPmut3* are green and correspond to GA1 cells while *mCherry*-labeled cells are red and correspond to**

*Pseudomonas* spp. cells. The grey backgrounds correspond to root views observed with transmitted light. Images are representative of the analysis of 9 images per condition.

## References

1. Touré Y, Ongena M, Jacques P, Guiro A, Thonart P. 2004. Role of lipopeptides produced by *Bacillus subtilis* GA1 in the reduction of grey mould disease caused by *Botrytis cinerea* on apple. *J Appl Microbiol* 96:1151–1160.
2. Molinatto G, Puopolo G, Sonogo P, Moretto M, Engelen K, Viti C, Ongena M, Pertot I. 2016. Complete genome sequence of *Bacillus amyloliquefaciens* subsp. *plantarum* S499, a rhizobacterium that triggers plant defences and inhibits fungal phytopathogens. *J Biotechnol* 238:56–59.
3. Chen XH, Koumoutsi A, Scholz R, Eisenreich A, Schneider K, Heinemeyer I, Morgenstern B, Voss B, Hess WR, Reva O, Junge H, Voigt B, Jungblut PR, Vater J, Süßmuth R, Liesegang H, Strittmatter A, Gottschalk G, Borriss R, Süßmuth R, Liesegang H, Strittmatter A, Gottschalk G, Borriss R, Süßmuth R, Liesegang H, Strittmatter A, Gottschalk G, Borriss R, Süßmuth R, Liesegang H, Strittmatter A, Gottschalk G, Borriss R. 2007. Comparative analysis of the complete genome sequence of the plant growth-promoting bacterium *Bacillus amyloliquefaciens* FZB42. *Nat Biotechnol* 25:1007–1014.
4. Pandin C, Le Coq D, Deschamps J, Védie R, Rousseau T, Aymerich S, Briandet R. 2018. Complete genome sequence of *Bacillus velezensis* QST713: A

- biocontrol agent that protects *Agaricus bisporus* crops against the green mould disease. *J Biotechnol* 278:10–19.
5. Perneel M, Heyrman J, Adiobo A, De Maeyer K, Raaijmakers JM, De Vos P, Höfte M. 2007. Characterization of CMR5c and CMR12a, novel fluorescent *Pseudomonas* strains from the cocoyam rhizosphere with biocontrol activity. *J Appl Microbiol* 103:1007–1020.
  6. Girard L, Lood C, Höfte M, Vandamme P, Rokni-Zadeh H, Van Noort V, Lavigne R, De Mot R. 2021. The ever-expanding *Pseudomonas* genus: Description of 43 new species and partition of the *Pseudomonas putida* group. *Microorganisms* 9:1766.
  7. D'aes J, Hua GKH, De Maeyer K, Pannecoucq J, Forrez I, Ongena M, Dietrich LEP, Thomashow LS, Mavrodi D V., Höfte M. 2011. Biological control of rhizoctonia root rot on bean by phenazine and cyclic lipopeptide-producing *Pseudomonas* CMR12a. *Phytopathology* 101:996–1004.
  8. D'aes J, Kieu NP, Léclère V, Tokarski C, Olorunleke FE, De Maeyer K, Jacques P, Höfte M, Ongena M. 2014. To settle or to move? The interplay between two classes of cyclic lipopeptides in the biocontrol strain *Pseudomonas* CMR12a. *Environ Microbiol* 16:2282–2300.
  9. Paulsen IT, Press CM, Ravel J, Kobayashi DY, Myers GSA, Mavrodi D V., DeBoy RT, Seshadri R, Ren Q, Madupu R, Dodson RJ, Durkin AS, Brinkac LM, Daugherty SC, Sullivan SA, Rosovitz MJ, Gwinn ML, Zhou L, Schneider DJ,

- Cartinhour SW, Nelson WC, Weidman J, Watkins K, Tran K, Khouri H, Pierson EA, Pierson LS, Thomashow LS, Loper JE. 2005. Complete genome sequence of the plant commensal *Pseudomonas fluorescens* Pf-5. *Nat Biotechnol* 23:873–878.
10. Jousset A, Schuldes J, Keel C, Maurhofer M, Daniel R, Scheu S, Thuermer A. 2014. Full-genome sequence of the plant growth-promoting bacterium *Pseudomonas protegens* CHA0. *Genome Announc* 2:322–336.
  11. Rieusset L, Rey M, Muller D, Vacheron J, Gerin F, Dubost A, Comte G, Prigent-Combaret C. 2020. Secondary metabolites from plant-associated *Pseudomonas* are overproduced in biofilm. *Microb Biotechnol* 13:1562–1580.
  12. Rokni-Zadeh H, Li W, Sanchez-Rodriguez A, Sinnaeve D, Rozenski J, Martins JC, De Mot R. 2012. Genetic and functional characterization of cyclic lipopeptide white-line-inducing principle (WLIP) production by rice rhizosphere isolate *Pseudomonas putida* RW10S2. *Appl Environ Microbiol* 78:4826–4834.
  13. Li W, Rokni-Zadeh H, De Vleeschouwer M, Ghequire MGK, Sinnaeve D, Xie GL, Rozenski J, Madder A, Martins JC, De Mot R. 2013. The antimicrobial compound xantholysin defines a new group of *Pseudomonas* cyclic lipopeptides. *PLoS One* 8:e62946.
  14. Oni FE, Geudens N, Omoboye OO, Bertier L, Hua HGK, Adiobo A, Sinnaeve D, Martins JC, Höfte M. 2019. Fluorescent *Pseudomonas* and cyclic lipopeptide diversity in the rhizosphere of cocoyam (*Xanthosoma sagittifolium*). *Environ Microbiol* 21:1019–1034.

15. Loper JE, Hassan KA, Mavrodi D V., Davis EW, Lim CK, Shaffer BT, Elbourne LDH, Stockwell VO, Hartney SL, Breakwell K, Henkels MD, Tetu SG, Rangel LI, Kidarsa TA, Wilson NL, van de Mortel JE, Song C, Blumhagen R, Radune D, Hostetler JB, Brinkac LM, Durkin AS, Kluepfel DA, Wechter WP, Anderson AJ, Kim YC, Pierson LS, Pierson EA, Lindow SE, Kobayashi DY, Raaijmakers JM, Weller DM, Thomashow LS, Allen AE, Paulsen IT. 2012. Comparative genomics of plant-associated *Pseudomonas* spp.: Insights into diversity and inheritance of traits involved in multitrophic interactions. *PLoS Genet* 8:e1002784.
16. Miguel RN, Barret M, Morrisey JP, Germaine K, Francisco MG, Barahona E, Navazo A, María SC, Moynihan JA, Giddens SR, Coppoolse ER, Muriel C, Stiekema WJ, Rainey PB, Dowling D, O'gara F, Martín M, Rivilla R. 2012. Genome sequence of the biocontrol strain *Pseudomonas fluorescens* F113. *J Bacteriol* 194:1273–1274.
17. Hanahan D. 1983. Studies on transformation of *Escherichia coli* with plasmids. *J Mol Biol* 166:557–580.
18. Bisicchia P, Botella E, Devine KM. 2010. Plasmid Suite of novel vectors for ectopic insertion of GFP , CFP and IYFP transcriptional fusions in single copy at the *amyE* and *bgIS* loci in *Bacillus subtilis*. *Plasmid* 64:143–149.
19. Meyer T, Vigouroux A, Aumont-Nicaise M, Comte G, Vial L, Lavire C, Moréra S. 2018. The plant defense signal galactinol is specifically used as a nutrient by the bacterial pathogen *Agrobacterium fabrum*. *J Biol Chem* 293:7930–7941.

20. Martínez-García E, de Lorenzo V. 2011. Engineering multiple genomic deletions in Gram-negative bacteria: analysis of the multi-resistant antibiotic profile of *Pseudomonas putida* KT2440. *Environ Microbiol* 13:2702–2716.
21. Blin K, Shaw S, Kloosterman AM, Charlop-Powers Z, Van Wezel GP, Medema MH, Weber T. 2021. antiSMASH 6.0: improving cluster detection and comparison capabilities. *Nucleic Acids Res* 49:W29–W35.
22. Sinnaeve D, Michaux C, Van hemel J, Vandekerckhove J, Peys E, Borremans FAM, Sas B, Wouters J, Martins JC. 2009. Structure and X-ray conformation of pseudodesmins A and B, two new cyclic lipodepsipeptides from *Pseudomonas* bacteria. *Tetrahedron* 65:4173–4181.
23. Oni FE, Geudens N, Olorunleke OF, Salami AE, Omoboye OO, Arias AA, Adiobo A, Neve SD, Ongena M, Martins JC, Höfte M. 2020. Cyclic lipopeptide-producing *Pseudomonas koreensis* group strains dominate the cocoyam rhizosphere of a *Pythium* root rot suppressive soil contrasting with *P. putida* prominence in conducive soils. *Env Microbiol* 22:5137–5155.
24. Kuiper I, Lagendijk EL, Pickford R, Derrick JP, Lamers GEM, Thomas-Oates JE, Lugtenberg BJJ, Bloemberg G V. 2003. Characterization of two *Pseudomonas putida* lipopeptide biosurfactants, putisolvin I and II, which inhibit biofilm formation and break down existing biofilms. *Mol Microbiol* 51:97–113.
25. Bassarello C, Lazzaroni S, Bifulco G, Lo Cantore P, Iacobellis NS, Riccio R, Gomez-Paloma L, Evidente A. 2004. Tolaasins A–E, Five New Lipodepsipeptides



Produced by *Pseudomonas tolaasii*. J Nat Prod 67:811–816.

26. Ma Z, Hoang Hua GKH, Ongena M, Höfte M. 2016. Role of phenazines and cyclic lipopeptides produced by *Pseudomonas* sp. CMR12a in induced systemic resistance on rice and bean. Environ Microbiol Rep 8:896–904.
